# Supplementary material
Source: Springer Nature journal article supplement (https://www.springermedizin.de/resource/supplementary/12885_2011_2727_MOESM1_ESM.pdf/9461908)

**A.**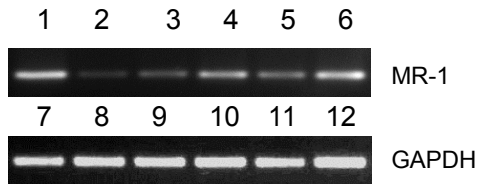**B.**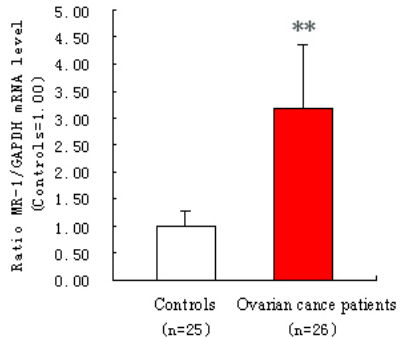

Supplement: MOESM1 [file 9461908]
